# Supplementary material for: Rapid and parallel changes in activity and mRNA of intestinal peptidase to match altered dietary protein level in juvenile house sparrows (Passer domesticus)
Source: Oxford University Press journal article supplement (doi:10.1242/jeb.234708), 2020-01-01
Supplement: jeb234708supp.pdf [file jeb234708supp.pdf]

## Supplementary Information

Table S1. Comparison of change in APN mRNA by two methods in nestlings switched from lower protein to higher protein diet.

| Diet group                                                                             | Age (d) | APN activity <sup>α</sup><br>(μmol min <sup>-1</sup> g <sup>-1</sup> tissue) |      |      | APN mRNA <sup>β</sup><br>(Method 1)            |        |       | APN mRNA <sup>γ</sup><br>(Method 2)            |         |       |
|----------------------------------------------------------------------------------------|---------|------------------------------------------------------------------------------|------|------|------------------------------------------------|--------|-------|------------------------------------------------|---------|-------|
|                                                                                        |         | <i>n</i>                                                                     | Mean | S.D. | <i>n</i>                                       | Mean   | S.D.  | <i>n</i>                                       | Mean    | S.D.  |
| Eating lower protein diet S for prior 3 d                                              | 6       | 12                                                                           | 4.83 | 0.73 | 9                                              | 0.000# | 0.264 | 9                                              | 0.000## | 0.121 |
| Initially ate lower protein diet S for 3 d, then switched 1 d to higher protein diet P | 7       | 12                                                                           | 6.53 | 1.54 | 10                                             | 0.602  | 0.237 | 10                                             | 0.686   | 0.460 |
| <i>t</i> -test comparison <sup>†</sup>                                                 |         | <i>t</i> <sub>22</sub> =3.35, <i>P</i> =0.003                                |      |      | <i>t</i> <sub>16</sub> =3.99, <i>P</i> <0.0001 |        |       | <i>t</i> <sub>16</sub> =5.05, <i>P</i> =0.0012 |         |       |

<sup>α</sup>data from (Rott et al., 2017b) – Rott et al. (2017)<sup>β</sup> estimated using the data driven normalization procedure (Norma-gene algorithm) according to (Heckmann et al., 2011)- Heckmann *et al.* (2011)<sup>γ</sup> estimated using a reference gene (GAPDH) according to (Schmittgen and Livak, 2008) – Schmittgen & Livak (2008), the comparative C(T) method# & ## actual computed values were #: 3.08x10<sup>-18</sup> and ##: 1.11x10<sup>-4</sup><sup>†</sup>*t*-test for pooled variances, after confirming data were normally distributed (Lilliefors test) and homoscedastic (Levene's test) (Wilkinson, 2009)
